# Supplementary material for: Zileuton, a 5-Lipoxygenase Inhibitor, Exerts Anti-Angiogenic Effect by Inducing Apoptosis of HUVEC via BK Channel Activation
Source: MDPI journal article supplement (doi:10.3390/cells8101182), 2019-09-30
Supplement: s1 [file s1]

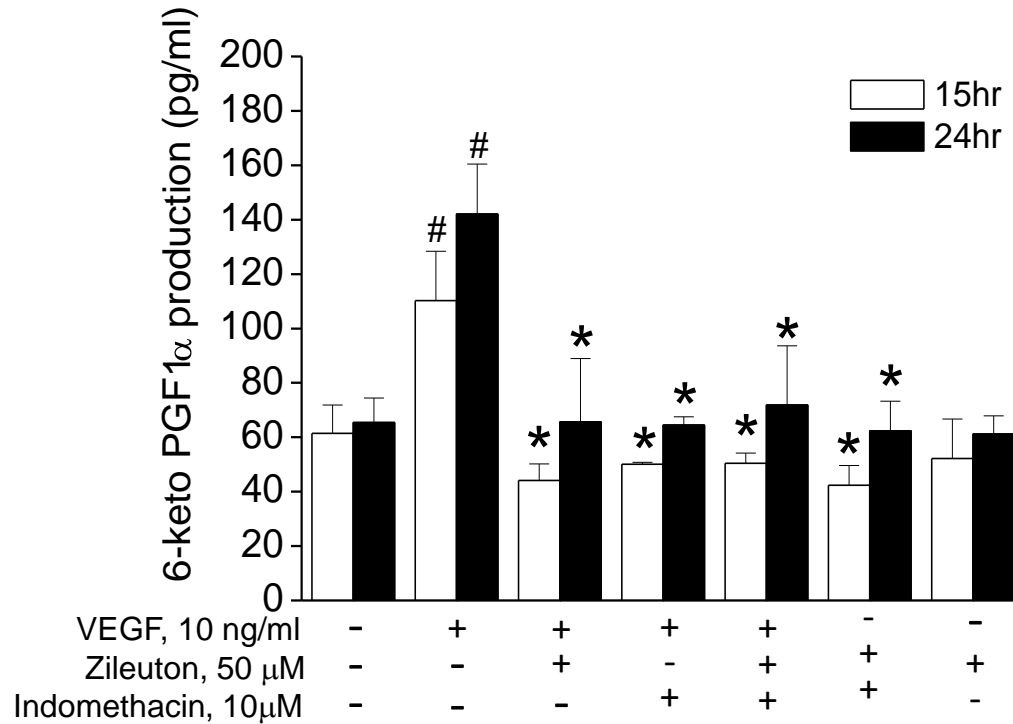

**Figure S1.** Effects of zileuton on VEGF-induced  $\text{PGI}_2$  production in HUVECs. HUVECs were incubated with either zileuton (50  $\mu\text{M}$ ) or indomethacin (10  $\mu\text{M}$ ) for 1 h and then stimulated with VEGF (10 ng/mL) for 15 or 24 h. 6-keto  $\text{PGF1}\alpha$  production was determined by Elisa kits. Data shown represent the means  $\pm$  SD from three independent experiments (each performed in duplicate). # $p < 0.05$  versus non-treated cells, \* $p < 0.05$  versus VEGF-treated cells.
